# Supplementary material for: Activation of N-methyl-D-aspartate receptor regulates insulin sensitivity and lipid metabolism
Source: PubMed Central journal article supplement (PMC7797674; doi:10.7150/thno.51666), 2021-01-01
Supplement: thnov11p2247s1.pdf [file thnov11p2247s1.pdf]

## Supplementary Figure

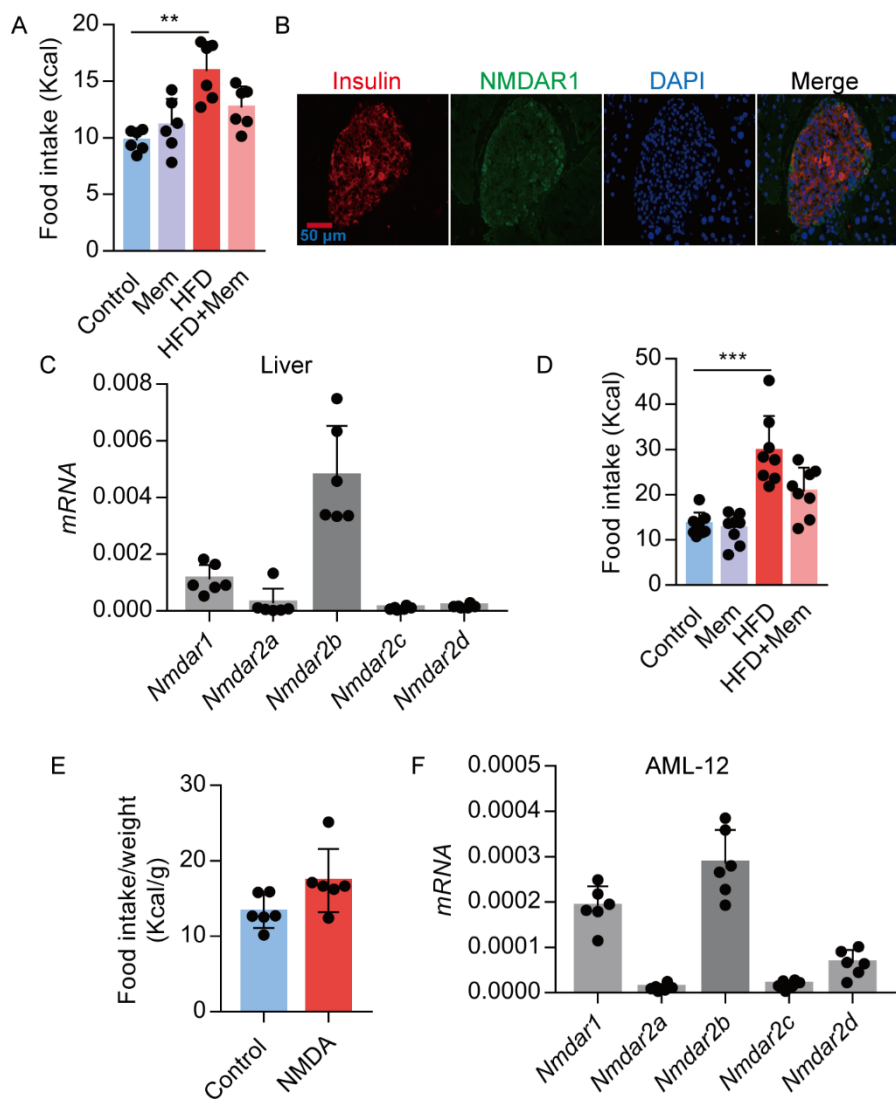

**Sup Figure 1.** (A) Determination of food intake of mice fed with HFD or normal chow diet for 12 weeks ( $n = 6$ ). (B) Representative immunofluorescence staining images of pancreases in control mice (Insulin: red, NMDAR1: Green, DAPI: blue,  $n = 4$ ). (C) RT-PCR analysis of NMDAR genes in liver tissue of mice ( $n = 6$ ). (D) Determination of food intake of mice fed with HFD or normal chow diet for 24 weeks ( $n = 8$ ). (E) Determination of food intake of mice treated with NMDA for 6 months ( $n = 6$ ). (F) RT-PCR analysis of NMDAR genes in AML-12 hepatocytes ( $n = 6$ ). \*\* $P < 0.01$ , \*\*\* $P < 0.001$ . All data are presented as the mean  $\pm$  SEM.

## Supplementary Table

| Gene           | Species | Forward primer (5'–3')      | Reverse primer (5'–3')      | Table      |
|----------------|---------|-----------------------------|-----------------------------|------------|
| <i>Acox1</i>   | mouse   | CCTGATTCAGCAAGGTAGGG        | TCGCAGACCCTGAAGAAATC        | e 1.       |
| <i>Cpt1a</i>   | mouse   | AGTGGCCTCACAGACTCCAG        | GCCCATGTTGTACAGCTTCC        | Seq        |
| <i>Hmgcs2</i>  | mouse   | ATACCACCAACGCCTGTTATG       | CAATGTCACCACAGACCACCA       | uenc       |
| <i>Cyp4a10</i> | mouse   | AAGGGTCAAACACCTCTGGA        | GATGGACGCTCTTTACCCAA        | es of      |
| <i>Pparγ</i>   | mouse   | GCTGTTATGGGTGAAACTCT        | TGGCATCTCTGTGTCAACCA        | spec       |
| <i>Cox7a1</i>  | mouse   | GTCTCCCAGGCTCTGGTCCG        | CTGTACAGGACGTTGTCCATTC      | ific       |
| <i>Pgclα</i>   | mouse   | TCCTCCTCATAAAGCCAACC        | GCCTTGGGTACCAGAACACT        | prim       |
| <i>Mcad</i>    | mouse   | CCAGAGAGGAGATTATCCCCG       | TACACCCATACGCCAACTCTT       | ers        |
| <i>Srebplc</i> | mouse   | GTTACTCGAGCCTGCCTTCAGG      | CAAGCTTTGGACCTGGGTGTG       | used       |
| <i>Accl</i>    | mouse   | GGACAGACTGATCGCAGAGAA<br>AG | TGGAGAGCCCCACACACA          | in<br>this |
| <i>Fas</i>     | mouse   | GCTGCGGAAACTTCAGGAAAT       | AGAGACGTGTCACTCCTGGAC<br>TT | stud<br>y  |
| <i>Lcad</i>    | mouse   | GCATCAACATCGCAGAGAAA        | TCGCAATATAGGGCATGACA        |            |
| <i>Etfdh</i>   | mouse   | GTCTTGATCCAGCTGCCTTC        | ACCTGGAAGAATTGGCACAG        |            |

|                                 |       |                            |                        |
|---------------------------------|-------|----------------------------|------------------------|
| <i>Chrebp</i>                   | mouse | CCTCACTTCACTGTGCCTCA       | ACAGGGGTTGTTGTCTCTGG   |
| <i>Mcp-1</i>                    | mouse | GTCCCTGTCATGCTTCTGG        | GCGTAACTGCATCTGGCT     |
| <i>Il-6</i>                     | mouse | CTGGGGATGTCTGTAGCTCA       | CTGTGAAGTCTCCTCTCCGG   |
| <i>Tnf-<math>\alpha</math></i>  | mouse | AGCCCCAGTCTGTATCCTT        | CTCCCTTTGCAGAACTCAGG   |
| <i><math>\beta</math>-actin</i> | mouse | TTCCAGCCTTCCTTCTTG         | GGAGCCAGAGCAGTAATC     |
| <i>Nmdar1</i>                   | mouse | ACTCCCAACGACCACTTCAC       | GTAGACGCGCATCATCTCAA   |
| <i>Nmdar2a</i>                  | mouse | AGACCTTAGCAGGCCCTCTC       | CTCTTGCTGTCCTCCAGACC   |
| <i>Nmdar2b</i>                  | mouse | CCGCAGCACTATTGAGAACA       | ATCCATGTGTAGCCGTAGCC   |
| <i>Nmdar2c</i>                  | mouse | ATCGGGGTCAACAATACCAA       | CACAGCAGAACCTCCACTGA   |
| <i>Nmdar2d</i>                  | mouse | TAGTGTCAGTGCGCAGATCC       | TCCTGGCAGAAGAAGTGGTT   |
| <i>Lcad</i>                     | human | AAGCGAAACGTTTGGACTCC       | CCCACATGTATCCCCAACCT   |
| <i>Etfdh</i>                    | human | GCTCTTGGTCTTGTGGTTGG       | AGCCACCTTCATTGAGAGCT   |
| <i>Acox1</i>                    | human | GGGACCCATAAGCCTTTGCC       | CTTGTTACTACGCGGTTTCACG |
| <i>Cpt1a</i>                    | human | ATCAATCGGACTCTGGAAACGG     | ATCTTGGTGGCACGACTCATCT |
| <i>Hmgcs2</i>                   | human | TCTGTCCCCTTGCAATTCCA       | TAGAACAGGGAAGTGGGCTG   |
| <i>Cox7a1</i>                   | human | GTACCGAGTGACAATGACGC       | GGCCAGCGTTTATTGACACT   |
| <i>Pgc1<math>\alpha</math></i>  | human | CACCAGCCAACACTCAGCTAA<br>G | AGGGTCATCGTTTGTGGTCAG  |
| <i>Mead</i>                     | human | TGTGGAAGCAGATACCCCAG       | ACCAGCTCCGTCACCAATTA   |
| <i>Gapdh</i>                    | human | CCAAGGAGTAAGACCCCTGG       | AGGGGAGATTCAAGTGTGGTG  |

---
